# Supplementary material for: High Species Richness of Scinax Treefrogs (Hylidae) in a Threatened Amazonian Landscape Revealed by an Integrative Approach
Source: PLOS journal article supplement (doi:10.1371/journal.pone.0165679), 2016-11-02
Supplement: S1 (10.1371/journal.pone.0165679.s001) [file journal.pone.0165679.s001]

# Formulae for cryptic diversity estimates

The calculation of cryptic diversity estimates (underestimation and/or increasement of species) is not standardized among studies focused on Neotropical diversity of frogs. Therefore, comparisons between diversity estimates may be difficult among different studies. Here, we suggest a standardization in the use of the terms underestimation and increasement in biodiversity studies. Furthermore, we encourage researchers to use these formulas in future comparisons.

We use data from *Engystomops* presented by [1] to show how the formulas work. After integrative analyses, two currently recognized species of *Engystomops* represent actually five to seven species. We use the conservative result (two nominal species + three candidate species) in our examples.

## Increase formula

$$UND = (Ce * 100)/De$$

Where *Ce* is the candidate species number in a sampled area, *De* is the number of nominal species in the same area, and the number *100* is a fixed percentage.

Example:

$$UND = ((3 * 100)/2) = \mathbf{150\% \text{ of increase.}}$$

## Underestimation formula

$$INC = (Ce * 100)/(De + Ce)$$

Where *Ce* is the candidate species number in a sampled area, *De* is the number of nominal species in the same area, and the number *100* is a fixed percentage.

Example:

$$INC = (3 * 100)/(2+3) = \mathbf{60\% \text{ of underestimation.}}$$

## References

1. Funk WC, Caminer M, Ron SR. High levels of cryptic species diversity uncovered in Amazonian frogs. Proc R Soc Lond B Biol Sci. 2012; 279: 1806-1814. doi: 10.1098/rspb.2011.1653
